# Supplementary material for: Efficacy and safety of add-on mirogabalin to conventional therapy for the treatment of peripheral neuropathic pain after thoracic surgery: the multicenter, randomized, open-label ADMIT-NeP study
Source: Springer Nature journal article supplement (doi:10.1186/s12885-023-11708-2), 2024-01-15
Supplement: MOESM1 [file 26629242]

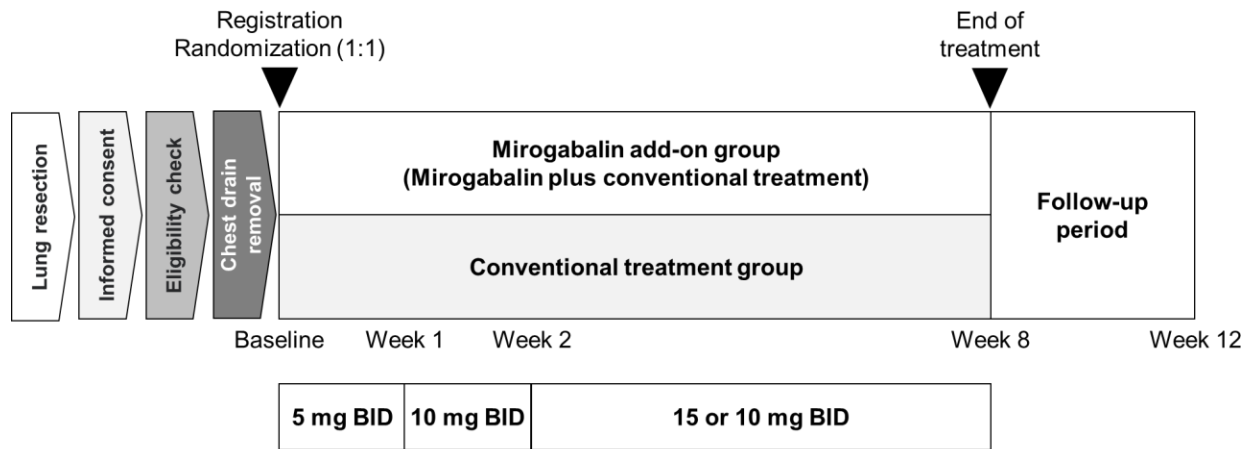

(Patients with CrCL of 30 to < 60 mL/min receive half the dose of mirogabalin)

### Additional file 1 Study design

The administration of study drugs was started at 1 or 2 days after the removal of the chest drain, which was set as baseline.

BID, twice daily; CrCL, creatinine clearance.
