# Supplementary material for: Efficacy and safety of add-on mirogabalin to conventional therapy for the treatment of peripheral neuropathic pain after thoracic surgery: the multicenter, randomized, open-label ADMIT-NeP study
Source: Springer Nature journal article supplement (doi:10.1186/s12885-023-11708-2), 2024-01-15
Supplement: MOESM2 [file 26629242]

**Additional file 2** List of participating institutions and principal investigators

| <b>Name of institution</b>                                               | <b>Name of the principal investigator at the study site</b> |
|--------------------------------------------------------------------------|-------------------------------------------------------------|
| Nagasaki University Hospital                                             | Takeshi Nagayasu <sup>a</sup>                               |
| National Hospital Organization Nagasaki Medical Center                   | Tsutomu Tagawa                                              |
| Local incorporated administrative agency Sasebo City<br>General Hospital | Akihiro Nakamura<br>Shigeyuki Morino                        |
| National Hospital Organization Ureshino Medical Center                   | Masamichi Kondou                                            |
| Ehime Prefectural Central Hospital                                       | Katsuro Furukawa                                            |
| Kumamoto University Hospital                                             | Makoto Suzuki                                               |
| University of Miyazaki Hospital                                          | Takanori Ayabe<br>Masaki Tomita                             |
| Kagoshima University Graduate School of Medical and<br>Dental Sciences   | Masami Sato<br>Kazuhiro Ueda                                |
| Oita Prefectural Hospital                                                | Ryotaro Kamohara                                            |
| Japanese Red Cross Nagasaki Genbaku Hospital                             | Isao Sano                                                   |
| Niigata University Medical and Dental Hospital                           | Masanori Tsuchida                                           |
| University of Tsukuba Hospital                                           | Yukinobu Goto                                               |
| Tokyo Medical University Hospital                                        | Norihiko Ikeda                                              |
| Fukuoka University Hospital                                              | Toshihiko Sato                                              |

<sup>a</sup> Principal investigator.
