# Supplementary material for: Efficacy and safety of add-on mirogabalin to conventional therapy for the treatment of peripheral neuropathic pain after thoracic surgery: the multicenter, randomized, open-label ADMIT-NeP study
Source: Springer Nature journal article supplement (doi:10.1186/s12885-023-11708-2), 2024-01-15
Supplement: MOESM3 [file 26629242]

**Additional file 3** Mirogabalin daily dose for 12 weeks by renal function at enrollment (mITT population, N = 63)

| Mirogabalin dose | CrCL ≥ 60 mL/min |           |           |           |           | CrCL 30 to < 60 mL/min |           |          |          |          |
|------------------|------------------|-----------|-----------|-----------|-----------|------------------------|-----------|----------|----------|----------|
|                  | Baseline         | Day 1     | Week 2    | Week 4    | Week 8    | Baseline               | Day 1     | Week 2   | Week 4   | Week 8   |
| 15 mg BID        | 0 (0.0)          | 0 (0.0)   | 15 (34.9) | 21 (50.0) | 20 (47.6) | 0 (0.0)                | 0 (0.0)   | 0 (0.0)  | 0 (0.0)  | 0 (0.0)  |
| 10 mg BID        | 1 (2.3)          | 1 (2.3)   | 22 (51.2) | 14 (33.3) | 16 (38.1) | 0 (0.0)                | 0 (0.0)   | 0 (0.0)  | 0 (0.0)  | 0 (0.0)  |
| 7.5 mg BID       | 0 (0.0)          | 0 (0.0)   | 0 (0.0)   | 0 (0.0)   | 0 (0.0)   | 0 (0.0)                | 0 (0.0)   | 7 (43.8) | 9 (56.3) | 9 (56.3) |
| 5 mg BID         | 43 (97.7)        | 43 (97.7) | 6 (14.0)  | 6 (14.3)  | 6 (14.3)  | 1 (5.3)                | 1 (5.3)   | 8 (50.0) | 6 (37.5) | 6 (37.5) |
| 2.5 mg BID       | 0 (0.0)          | 0 (0.0)   | 0 (0.0)   | 0 (0.0)   | 0 (0.0)   | 18 (94.7)              | 18 (94.7) | 1 (6.3)  | 1 (6.3)  | 1 (6.3)  |
| Other            | 0 (0.0)          | 0 (0.0)   | 0 (0.0)   | 1 (2.4)   | 0 (0.0)   | 0 (0.0)                | 0 (0.0)   | 0 (0.0)  | 0 (0.0)  | 0 (0.0)  |

Data are n (%).

BID, twice daily; CrCL, creatinine clearance; mITT, modified intention-to-treat.
