# Supplementary material for: Efficacy and safety of add-on mirogabalin to conventional therapy for the treatment of peripheral neuropathic pain after thoracic surgery: the multicenter, randomized, open-label ADMIT-NeP study
Source: Springer Nature journal article supplement (doi:10.1186/s12885-023-11708-2), 2024-01-15
Supplement: MOESM4 [file 26629242]

**Additional file 4** Change in VAS score while coughing from baseline to Week 8 (secondary endpoint) (mITT population)

|          | Mirogabalin add-on group<br>(N = 63) |                                               | Conventional treatment group<br>(N = 65) |                                               | Intergroup<br>difference <sup>a</sup> |
|----------|--------------------------------------|-----------------------------------------------|------------------------------------------|-----------------------------------------------|---------------------------------------|
|          | Mean ± SD                            | Change from<br>baseline                       | Mean ± SD                                | Change from<br>baseline                       |                                       |
| Baseline | 68.3 ± 18.9                          |                                               | 66.4 ± 18.8                              |                                               |                                       |
| Day 1    | 62.7 ± 20.4                          | -5.6 ± 16.2<br><i>P</i> = 0.008 <sup>b</sup>  | 54.9 ± 23.2                              | -11.4 ± 21.1<br><i>P</i> < 0.001 <sup>b</sup> | <i>P</i> = 0.088                      |
| Week 2   | 32.0 ± 21.4                          | -36.6 ± 21.2<br><i>P</i> < 0.001 <sup>b</sup> | 33.0 ± 25.4                              | -33.2 ± 28.2<br><i>P</i> < 0.001 <sup>b</sup> | <i>P</i> = 0.470                      |
| Week 4   | 15.6 ± 13.7                          | -53.0 ± 21.0<br><i>P</i> < 0.001 <sup>b</sup> | 20.5 ± 23.4                              | -44.8 ± 26.2<br><i>P</i> < 0.001 <sup>b</sup> | <i>P</i> = 0.078                      |
| Week 8   | 8.5 ± 12.2                           | -59.2 ± 20.0<br><i>P</i> < 0.001 <sup>b</sup> | 13.1 ± 19.6                              | -51.9 ± 26.7<br><i>P</i> < 0.001 <sup>b</sup> | <i>P</i> = 0.121                      |

<sup>a</sup> vs. the conventional treatment group by *t*-test.

<sup>b</sup> vs. baseline by paired *t*-test.

mITT, modified intention-to-treat; SD, standard deviation; VAS, Visual Analogue Scale.
