# Supplementary material for: Efficacy and safety of add-on mirogabalin to conventional therapy for the treatment of peripheral neuropathic pain after thoracic surgery: the multicenter, randomized, open-label ADMIT-NeP study
Source: Springer Nature journal article supplement (doi:10.1186/s12885-023-11708-2), 2024-01-15
Supplement: MOESM5 [file 26629242]

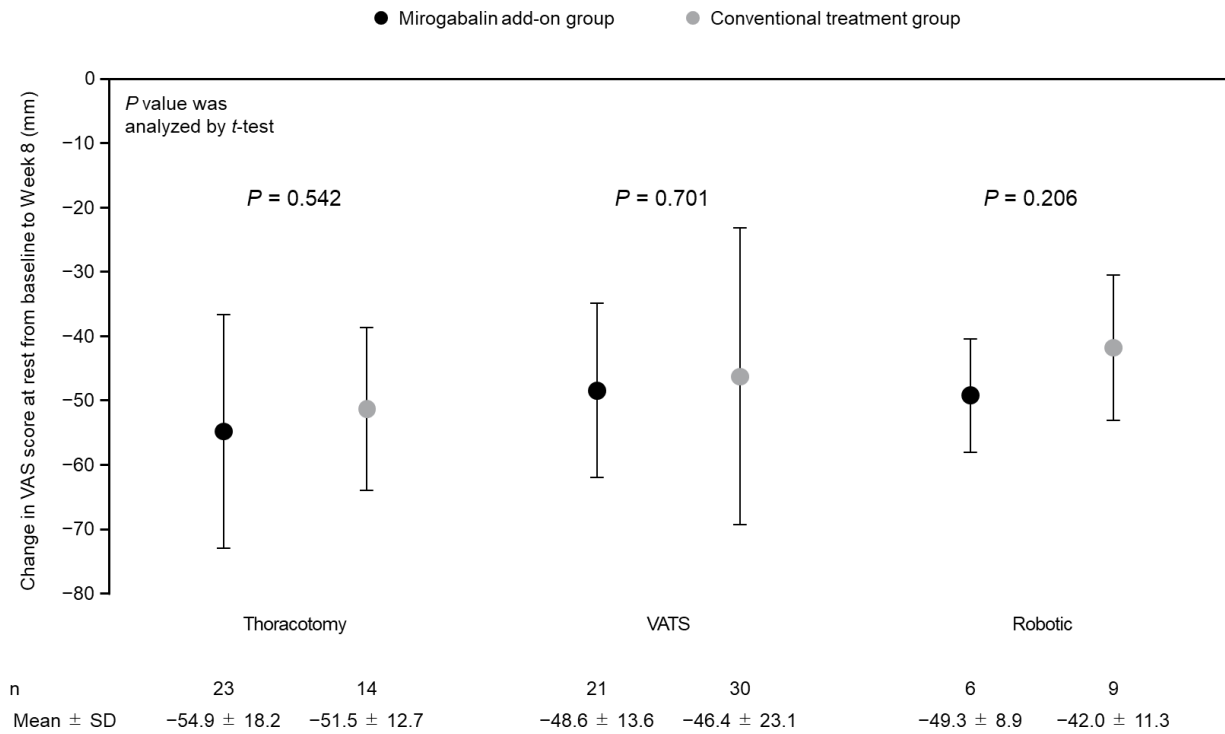

**Additional file 5** Changes in VAS score at rest from baseline to Week 8 by type of lung resection in the mITT population

Data are mean ± SD. *P* values for intergroup differences were calculated by *t*-test.

mITT, modified intention-to-treat; SD, standard deviation; VAS, Visual Analogue Scale;

VATS, video-assisted thoracoscopic surgery.
