# Supplementary material for: Efficacy and safety of add-on mirogabalin to conventional therapy for the treatment of peripheral neuropathic pain after thoracic surgery: the multicenter, randomized, open-label ADMIT-NeP study
Source: Springer Nature journal article supplement (doi:10.1186/s12885-023-11708-2), 2024-01-15
Supplement: MOESM6 [file 26629242]

**Additional file 6** Change from baseline to Week 8 in VAS score for sleep disturbance (mITT population)

|          | <b>Mirogabalin add-on group</b> |                                               | <b>Conventional treatment group</b> |                                               | <b>Intergroup difference<sup>a</sup></b> |
|----------|---------------------------------|-----------------------------------------------|-------------------------------------|-----------------------------------------------|------------------------------------------|
|          | <b>(N = 63)</b>                 |                                               | <b>(N = 65)</b>                     |                                               |                                          |
|          | <b>Mean ± SD</b>                | <b>Change from baseline</b>                   | <b>Mean ± SD</b>                    | <b>Change from baseline</b>                   |                                          |
| Baseline | 46.4 ± 29.6                     |                                               | 46.8 ± 31.6                         |                                               |                                          |
| Day 1    | 41.1 ± 29.6                     | -5.3 ± 23.9<br><i>P</i> = 0.086 <sup>b</sup>  | 31.6 ± 24.7                         | -14.6 ± 33.0<br><i>P</i> < 0.001 <sup>b</sup> | <i>P</i> = 0.074                         |
| Week 2   | 16.3 ± 19.7                     | -31.9 ± 28.3<br><i>P</i> < 0.001 <sup>b</sup> | 21.8 ± 24.9                         | -24.0 ± 37.3<br><i>P</i> < 0.001 <sup>b</sup> | <i>P</i> = 0.211                         |
| Week 4   | 8.8 ± 13.1                      | -39.9 ± 28.9<br><i>P</i> < 0.001 <sup>b</sup> | 15.4 ± 19.8                         | -30.2 ± 28.3<br><i>P</i> < 0.001 <sup>b</sup> | <i>P</i> = 0.081                         |
| Week 8   | 5.6 ± 10.0                      | -41.4 ± 28.4<br><i>P</i> < 0.001 <sup>b</sup> | 8.0 ± 12.0                          | -37.1 ± 32.3<br><i>P</i> < 0.001 <sup>b</sup> | <i>P</i> = 0.474                         |

<sup>a</sup> vs. the conventional treatment group by *t*-test.

<sup>b</sup> vs. baseline by paired *t*-test.

mITT, modified intention-to-treat; SD, standard deviation; VAS, Visual Analogue Scale.
