# Supplementary material for: Efficacy and safety of add-on mirogabalin to conventional therapy for the treatment of peripheral neuropathic pain after thoracic surgery: the multicenter, randomized, open-label ADMIT-NeP study
Source: Springer Nature journal article supplement (doi:10.1186/s12885-023-11708-2), 2024-01-15
Supplement: MOESM7 [file 26629242]

**Additional file 7** PGIC at Week 8

| mITT population       |                                         |                                             |                    |
|-----------------------|-----------------------------------------|---------------------------------------------|--------------------|
|                       | Mirogabalin add-on<br>group<br>(N = 63) | Conventional<br>treatment group<br>(N = 65) | <i>P</i> value     |
| PGIC evaluation       |                                         |                                             |                    |
| No                    | 13 (20.6)                               | 12 (18.5)                                   | 0.825 <sup>a</sup> |
| Yes                   | 50 (79.4)                               | 53 (81.5)                                   |                    |
| 1. Very much improved | 6 (12.0)                                | 5 (9.4)                                     | 0.596 <sup>b</sup> |
| 2. Much improved      | 38 (76.0)                               | 34 (64.2)                                   |                    |
| 3. Minimally improved | 1 (2.0)                                 | 9 (17.0)                                    |                    |
| 4. No change          | 3 (6.0)                                 | 4 (7.5)                                     |                    |
| 5. Minimally worse    | 0 (0.0)                                 | 1 (1.9)                                     |                    |
| 6. Much worse         | 2 (4.0)                                 | 0 (0.0)                                     |                    |
| 7. Very much worse    | 0 (0.0)                                 | 0 (0.0)                                     |                    |
| PGIC (score ≤ 2)      | 44 (88.0)                               | 39 (73.6)                                   | 0.083 <sup>a</sup> |
| PGIC (score ≤ 3)      | 45 (90.0)                               | 48 (90.6)                                   | 1.000 <sup>a</sup> |

Data are n (%) unless otherwise indicated.

<sup>a</sup> Fisher test.

<sup>b</sup> Cochran–Armitage test.

mITT, modified intention-to-treat; PGIC, Patient Global Impression of Change.
